1 **Relationship between sexting and self-esteem, depression, anxiety, and stress**  
2 **among young people**

3 **Petros Galanis**

4 Assistant Professor, Clinical Epidemiology Laboratory, Department of Nursing,  
5 National and Kapodistrian University of Athens, Athens, Greece

6 **Zoe Katsiroumpa**

7 MSc, Department of Education and Social Work, University of Patras, Patras, Greece

8 **Aglaia Katsiroumpa**

9 RN, MSc, PhD (c), Clinical Epidemiology Laboratory, Department of Nursing,  
10 National and Kapodistrian University of Athens, Athens, Greece

11 **Anastasia Tsakalaki**

12 MSc, Institute of Educational Policy, Athens, Greece

13 **Stefanos Vasilopoulos**

14 Professor, Department of Education and Social Work, University of Patras, Patras,  
15 Greece

16 Corresponding author: P. Galanis, 123 Papadiamantopoulou street, GR-11527,  
17 Athens, Greece, Tel:+30210.7781044, e-mail: pegalan@nurs.uoa.gr

18

19

1 **Abstract**

2 **Introduction:** The huge spread of the internet and especially of social media has led  
3 to new ways of communication, even erotic communication, especially among young  
4 people, replacing, in many cases, activities that until now required the face-to-face  
5 meeting of individuals. **Aim:** To investigate the relationship between sexting and self-  
6 esteem, depression, anxiety, and stress among young people. Also, we investigated  
7 the impact of demographic characteristics on sexting. **Methods:** A cross-sectional  
8 study was conducted with 368 young people aged 18-30 years old. We created an  
9 anonymous form of the study questionnaire with Google forms and we disseminated it  
10 through social media. Thus, we obtained a convenience sample. We used valid scales  
11 to measure sexting, self-esteem, depression, anxiety and stress among young people.  
12 All scales in our study had very good Cronbach's alpha. **Results:** Mean age of the  
13 participants was 23.7 years, while 82.3% was females. Mean every day time that  
14 participants spent on social media/platforms/applications was 4.7 hours. Participants  
15 used more often to communicate with others Instagram (86.8%) and Facebook  
16 (62.8%), and then Viber (29.9%), TikTok (9.8%), Snapchat (6%) and WhatsApp  
17 (5.1%). Frequency of texting was low among participants, while self-esteem level was  
18 average. Moreover, participants had higher levels of stress than depression and  
19 anxiety. We found that increased sexting was associated with decreased self-esteem  
20 ( $r=-0.3$ ,  $p=0.02$ ), increased depression ( $r=0.4$ ,  $p=0.001$ ), increased anxiety ( $r=0.3$ ,  
21  $p=0.005$ ), and increased stress ( $r=0.4$ ,  $p<0.001$ ). Multivariable linear regression  
22 analysis identified that increased number of accounts on social  
23 media/platforms/applications (coefficient  $\beta=0.07$ , 95% confidence interval=0.01 to  
24 0.13,  $p$ -value=0.023) and increased age (coefficient  $\beta=0.08$ , 95% confidence  
25 interval=0.01 to 0.13,  $p$ -value=0.003) was associated with increased sexting.  
26 **Conclusions:** Understanding the relationship between sexting and self-esteem,  
27 depression, anxiety, and stress in young people will give policy makers the

1 opportunity to develop appropriate health education programmes to reduce risky  
2 sexual behaviors.

3

4 **Key-words:** sexting, self-esteem, depression, anxiety, stress, Greece

## 1 **Introduction**

2 The huge spread of the internet and especially of social media has led to new ways of  
3 communication, even erotic communication, especially among young people,  
4 replacing, in many cases, activities that until now required the face-to-face meeting of  
5 individuals. This changing context of communication has also brought a change in  
6 behaviors, which is where sexting emerges from (Walker et al., 2011). The prevalence  
7 of sexting among young people is showing an increasing trend with a very wide  
8 variation from 0.9% to 78% (Barrense-Dias et al., 2017). The large variations in the  
9 prevalence of sexting are due to different measurement tools and different study  
10 designs (Dake et al., 2012; Klettke et al., 2018; Temple et al., 2014).

11 Sexting among young people is becoming increasingly widespread, becoming an  
12 extremely important issue that needs systematic investigation, mainly because of the  
13 negative consequences it brings, especially when its content is republished or shared,  
14 leading to humiliation, harassment or insult (Barrense-Dias et al., 2017). Sexting is  
15 essentially defined as sending and receiving personal material with sexual content via  
16 mobile phones, social media, websites and platforms (Krieger, 2017).

17 The exposure of young people's personal information on social media is constantly  
18 increasing. Thus, the young person is represented by his or her digital analogue,  
19 socialized and sexualized online. Particularly for young people, who by definition are  
20 in the phase of searching and developing their sexuality and sexual identity, it makes  
21 sense that the frequency of sexting is increased (Barrense-Dias et al., 2017). Sexting  
22 among young people is a predictor of sexual behaviors and may be associated with  
23 mental health disorders and risky behaviors (Baumgartner et al., 2012). The role of  
24 gender in sexting is controversial, as in some studies the prevalence of sexting is  
25 higher in boys and in others it is higher in girls (Baumgartner et al., 2012; Kerstens &  
26 Stol, 2014; Livingstone & Görzig, 2014; Vanden Abeele et al., 2012).

1 The negative consequences of sexting in young people are numerous and can be  
2 summarized in four broad categories (Doyle et al, 2021): (a) psychological  
3 consequences (victimisation, sexual bullying, mental health disorders, quality of life  
4 and emotional disturbances; (b) behavioural consequences (sexual activity and risky  
5 behaviours such as aggression); (c) consequences on young people's relationships  
6 with others with these relationships being friends, family or personal; and (d)  
7 consequences on young people's personal lives by sharing/exposing their personal  
8 moments to third parties.

9 To the best of our knowledge, there is no study in Greece that has investigated the  
10 relationship between sexting and self-esteem, depression, anxiety, and stress among  
11 young people. Thus, the aim of our study was to investigate the relationship between  
12 sexting and self-esteem, depression, anxiety, and stress among young people. Also,  
13 we investigated the impact of demographic characteristics on sexting.

## 14 **Methods**

### 15 **Study design**

16 A cross-sectional study was conducted with 368 young people aged 18-30 years old.  
17 We created an anonymous form of the study questionnaire with Google forms and we  
18 disseminated it through social media. Data collection was performed in September  
19 2022. Thus, we obtained a convenience sample. The participants were informed about  
20 the purpose and methodology of the study so that they could decide whether or not  
21 they wished to participate in the study. The participants were then asked to complete  
22 the questionnaire without giving their details (full name), which preserved their  
23 anonymity. There was no time limit, so that participants were not pressed for time and  
24 did not lead to rushed responses. Each questionnaire was placed in a special opaque  
25 envelope to which only the research team had access. This was the best way to ensure  
26 (a) the informed consent of the participants to participate in the study, (b) the

1 anonymity of the participants and (c) the confidentiality of the information to which  
2 only the research team had access. Study protocol was approved by the Ethics  
3 Committee of Faculty of Nursing of National and Kapodistrian University of Athens  
4 (reference number: 418, 22 September 2022).

## 5 **Measures**

6 We collected the following demographic characteristics of the participants: gender,  
7 age, kind of relationship, educational level of mothers and fathers, residence during  
8 the adolescence, accounts on Facebook, Instagram, TikTok, Snapchat, Viber,  
9 WhatsApp, hours spending on Facebook, Instagram, TikTok, Snapchat, Viber,  
10 WhatsApp, and communication with others through Facebook, Instagram, TikTok,  
11 Snapchat, Viber, WhatsApp.

12 To assess sexting among participants, the questionnaire of Bianchi et al. (2018) was  
13 used, which consists of 13 items (Bianchi et al., 2018). Each item of the questionnaire  
14 as well as the total score is given values from 1 to 5. Higher values in the  
15 questionnaire indicate a higher frequency of sexting. The questionnaire is reliable and  
16 valid in Greek (Galanis et al., 2022). In our study, Cronbach's alpha for the  
17 questionnaire was 0.81.

18 The "Rosenberg Self-Esteem scale" was used to assess self-esteem in participants,  
19 which consists of 10 items and receives a total score from 10 to 40 (Rosenberg, 1965).  
20 An increase in the score indicates higher self-esteem. Validation of the "Rosenberg  
21 Self-Esteem scale" has already performed in Greek (Galanou et al. 2014). In our  
22 study, Cronbach's alpha for the "Rosenberg Self-Esteem scale" was 0.86.

23 The "Depression Anxiety Stress Scales" was used to assess depression, anxiety and  
24 stress in participants (Lovibond & Lovibond 1995). Depression, anxiety and stress are  
25 measured by seven items each one and take values from 0 to 42. An increase in score  
26 indicates more depression, anxiety and stress. The "Depression Anxiety Stress Scales"

1 are proven reliable and valid in Greek (Lyraeos et al. 2011). In our study, Cronbach's  
2 alpha for the depression, anxiety and stress scales was 0.86, 0.78, and 0.89  
3 respectively.

#### 4 **Statistical analysis**

5 We present categorical variables with numbers (percentages) and continuous variables  
6 with mean (standard deviation). We used the Kolmogorov-Smirnov test to assess the  
7 distribution of the continuous variables. We found that the continuous variables  
8 followed the normal distribution. Bivariate analysis included independent samples t-  
9 test, analysis of variance, Pearson's correlation coefficient, and Spearman's  
10 correlation coefficient. We used multivariable linear regression analysis to assess the  
11 impact of demographic characteristics on sexting. All tests of statistical significance  
12 were two-tailed, and p-values<0.05 were considered as statistically significant.  
13 Statistical analysis was performed with the IBM SPSS 21.0 (IBM Corp. Released  
14 2012. IBM SPSS Statistics for Windows, Version 21.0 Armonk, NY, USA).

15

#### 16 **Results**

17 Study sample included 368 young people aged 18-30 years old. Demographic  
18 characteristics of the participants are shown in Table 1. Mean age of the participants  
19 was 23.7 years. Among the participants, 82.3% was females, 41.3% was in a serious  
20 relationship, and 50.3% were living in an urban area during the adolescence.

21

22 **Table 1.** Demographic characteristics of the 368 participants.

| <b>Characteristics</b> | <b>N</b> | <b>%</b> |
|------------------------|----------|----------|
| Gender                 |          |          |

|                                  |      |      |
|----------------------------------|------|------|
| Females                          | 303  | 82.3 |
| Males                            | 65   | 17.7 |
| Age (mean, standard deviation)   | 23.7 | 2.5  |
| Relationship                     |      |      |
| No                               | 184  | 49.9 |
| Open                             | 32   | 8.8  |
| Serious                          | 152  | 41.3 |
| Mother's educational level       |      |      |
| Elementary school                | 25   | 6.9  |
| High school                      | 160  | 43.5 |
| University degree                | 183  | 49.6 |
| Father's educational level       |      |      |
| Elementary school                | 43   | 11.8 |
| High school                      | 189  | 51.3 |
| University degree                | 136  | 36.9 |
| Residence during the adolescence |      |      |
| Urban area                       | 185  | 50.3 |
| Semi urban area                  | 138  | 37.5 |
| Rural area                       | 35   | 12.2 |

1

2 Social media/platforms/applications use of the participants is shown in Table 2. Mean

3 every day time that participants spent on social media/platforms/applications was 4.7



1 hours (2.9), while minimum value was 0.1 hours and maximum value was 16 hours.  
2 Participants used more often to communicate with others Instagram (86.8%) and  
3 Facebook (62.8%), and then Viber (29.9%), TikTok (9.8%), Snapchat (6%) and  
4 WhatsApp (5.1%).

5

6 **Table 2.** Social media/platforms/applications use of the participants.

|                                   | <b>Facebook</b> | <b>Instagram</b> | <b>TikTok</b> | <b>Snapchat</b> | <b>Viber</b> | <b>WhatsApp</b> |
|-----------------------------------|-----------------|------------------|---------------|-----------------|--------------|-----------------|
| Account on                        | 191 (81.6)      | 217 (92.7)       | 153 (65.4)    | 74 (31.6)       | 179 (76.5)   | 37 (15.8)       |
| Communication with others through | 147 (62.8)      | 203 (86.8)       | 23 (9.8)      | 14 (6)          | 70 (29.9)    | 12 (5.1)        |

7 Values are expressed as numbers (percentages).

8

9 Descriptive statistics for sexting, self-esteem, depression, anxiety, and stress scales  
10 are shown in Table 3. Frequency of texting was low among participants, while self-  
11 esteem level was average. Moreover, participants had higher levels of stress than  
12 depression and anxiety.

13

14 **Table 3.** Descriptive statistics for sexting, self-esteem, depression, anxiety, and stress  
15 scales.

| <b>Scale</b> | <b>Mean</b> | <b>Standard deviation</b> | <b>Minimum value</b> | <b>Maximum value</b> |
|--------------|-------------|---------------------------|----------------------|----------------------|
| Sexting      | 1.7         | 0.8                       | 1                    | 3.5                  |
| Self-esteem  | 28.2        | 4.1                       | 16                   | 38                   |
| Depression   | 10.1        | 9.3                       | 0                    | 42                   |
| Anxiety      | 8.9         | 8.2                       | 0                    | 36                   |
| Stress       | 14.9        | 9.5                       | 0                    | 42                   |

1

2 Relationships between sexting and self-esteem, depression, anxiety, and stress scales  
3 are shown in Table 4. We found that increased sexting was associated with decreased  
4 self-esteem ( $r=-0.3$ ,  $p=0.02$ ), increased depression ( $r=0.4$ ,  $p=0.001$ ), increased anxiety  
5 ( $r=0.3$ ,  $p=0.005$ ), and increased stress ( $r=0.4$ ,  $p<0.001$ ).

6

7 **Table 4.** Relationships between sexting and self-esteem, depression, anxiety, and  
8 stress scales.

|             | Sexting                           |         |
|-------------|-----------------------------------|---------|
|             | Pearson's correlation coefficient | P-value |
| Self-esteem | -0.3                              | 0.02    |
| Depression  | 0.4                               | 0.001   |
| Anxiety     | 0.3                               | 0.005   |
| Stress      | 0.4                               | <0.001  |

9

10 Bivariate analysis between demographic characteristics of the participants and sexting  
11 score are shown in Table 2. Multivariable linear regression analysis identified that  
12 increased number of accounts on social media/platforms/applications (coefficient  
13  $\beta=0.07$ , 95% confidence interval=0.01 to 0.13,  $p$ -value=0.023) and increased age  
14 (coefficient  $\beta=0.08$ , 95% confidence interval=0.01 to 0.13,  $p$ -value=0.003) was  
15 associated with increased sexting.

16

17 **Table 5.** Bivariate analysis between demographic characteristics of the participants  
18 and sexting score.

| Independent variables | Mean sexting score | Standard deviation | P-value |
|-----------------------|--------------------|--------------------|---------|
|-----------------------|--------------------|--------------------|---------|

|                                                                                             |      |                    |                   |
|---------------------------------------------------------------------------------------------|------|--------------------|-------------------|
| Gender                                                                                      |      |                    | 0.12 <sup>a</sup> |
| Females                                                                                     | 1.73 | 0.59               |                   |
| Males                                                                                       | 1.51 | 0.61               |                   |
| Age                                                                                         |      | 0.3 <sup>b</sup>   | 0.01 <sup>b</sup> |
| Mother's educational level                                                                  |      | 0.027 <sup>c</sup> | 0.7 <sup>c</sup>  |
| Father's educational level                                                                  |      | -0.12 <sup>c</sup> | 0.1 <sup>c</sup>  |
| Relationship                                                                                |      |                    | 0.3 <sup>d</sup>  |
| No                                                                                          | 1.69 | 0.62               |                   |
| Open                                                                                        | 1.71 | 0.63               |                   |
| Serious                                                                                     | 1.73 | 0.61               |                   |
| Residence during the adolescence                                                            |      |                    | 0.9 <sup>d</sup>  |
| Urban area                                                                                  | 1.61 | 0.62               |                   |
| Semi urban area                                                                             | 1.62 | 0.65               |                   |
| Rural area                                                                                  | 1.56 | 0.66               |                   |
| Every day hours that participants spent on social media/platforms/applications              |      | 0.12 <sup>b</sup>  | 0.22 <sup>b</sup> |
| Number of accounts on social media/platforms/applications                                   |      | 0.11 <sup>c</sup>  | 0.04 <sup>c</sup> |
| Number social media/platforms/applications that participants use to communicate with others |      | 0.16 <sup>c</sup>  | 0.11 <sup>c</sup> |

1 <sup>a</sup> independent samples t-test

2 <sup>b</sup> Pearson's correlation coefficient

3 <sup>c</sup> Spearman's correlation coefficient

4 <sup>d</sup> analysis of variance

5

6

## 1 **Discussion**

2 We conducted a cross-sectional study to investigate the relationship between sexting  
3 and self-esteem, depression, anxiety, and stress among young people.

4 We found that lower self-esteem was associated with an increased frequency of  
5 sexting among young people, a finding that is confirmed by studies in other countries  
6 such as Germany, Spain, Australia, the USA and Croatia (Eugene, 2015; Klettke et  
7 al., 2019; Schoeps et al., 2020; Scholes-Balog et al., 2016; Sesar, 2021; Tamarit et al.,  
8 2021; Wachs et al., 2017). One possible explanation for this relationship is that young  
9 people who have a negative self-image and underestimate their abilities tend to doubt  
10 themselves. For this reason, they try to increase their self-confidence by seeking both  
11 communication with other people and validation from others. It is also typical that  
12 young people with low self-esteem also have a worse body image which leads them  
13 sexting more often (Frost & McKelvie, 2004).

14 In addition, we found that increased depression, anxiety and stress in young people  
15 were associated with increased frequency of sexting. This finding is supported by  
16 several studies that have found sexting to be associated with mental health problems  
17 in young people such as depression, anxiety and stress (Chaudhary et al., 2017; Dake  
18 et al., 2012; Eugene, 2015; Frankel et al., 2018; Gámez-Guadix & de Santisteban,  
19 2018; Kim et al., 2020; Klettke et al., 2018, 2019; Temple et al., 2014; Van Ouytsel et  
20 al., 2014; Ybarra & Mitchell, 2014). The amount of time that young people spend on  
21 the internet and especially on social media has increased significantly in recent years,  
22 particularly with the emergence of smart phones that provide easy and quick access to  
23 social media. As a result, the internet is now one of the most common ways for young  
24 people to communicate with each other. This communication includes communication  
25 on an erotic level, including sexting. However, young people are not yet mature  
26 enough to manage the internet use properly, so that in many cases they spend an  
27 excessive number of hours on it and even engage in risky sexual behavior at the same

1 time. As a result, the increased use of social media, and more specifically sexting,  
2 leads young people to mental health problems such as depression, anxiety and stress.  
3 Particular attention needs to be paid to this link between sexting and mental health  
4 problems in young people as if not addressed early and effectively they can lead to  
5 even worse problems such as aggressive behavior, substance use, suicidal tendencies  
6 etc. For this reason, parents and teachers need to identify dangerous behavior of  
7 young people online, so that any mental health problems can be managed more  
8 effectively.

9 Regarding the effect of demographic characteristics on the frequency of sexting, we  
10 found that older teenagers sexting more often. This finding is confirmed by similar  
11 studies (Gómez-Guadix & de Santisteban, 2018; Molla-Esparza et al., 2021; Ybarra &  
12 Mitchell, 2014). It seems that as they get older, people have less hesitations and  
13 reservations regarding the use of sexting. In addition, older people may want to  
14 experiment more about their sex lives, with such experimentation including sexting.  
15 We also found that young people with more social media accounts sexting more  
16 frequently. This finding makes sense, as young people with more social media  
17 accounts are also quite likely to use these media more which increases the likelihood  
18 that they will use them for sexting.

19 The present study also had some limitations. Specifically, the information on the  
20 young people was obtained at a specific point in time without knowing the temporal  
21 sequence between the variables. For this reason, there is a need for studies that should  
22 follow the young people for a period of time in order to draw more secure conclusions  
23 about the relationship between sexting and self-esteem, depression, anxiety, and  
24 stress. In addition, the study was conducted on a specific sample of young people.  
25 Therefore, the results cannot be generalized to all young people in Greece. Therefore,  
26 further studies with different study samples need to be conducted in order to draw  
27 more valid conclusions. The questionnaires to assess sexting, self-esteem, depression,

1 anxiety and stress in the young people were self-completed. Finally, it is possible that  
2 there are other factors associated with sexting such as personality traits, psychological  
3 factors, etc. It is clear that more and larger sample size studies are needed in order to  
4 address errors to the greatest extent possible and draw safer conclusions.

5 In conclusion, although the present study found relationships between sexting and  
6 self-esteem, depression, anxiety and stress in young people, it is necessary to conduct  
7 further studies on other samples of young people in order to increase our knowledge  
8 in this research field. A better understanding of the relationship between sexting and  
9 self-esteem, depression, anxiety and stress in young people will also enable the  
10 development of appropriate health and internet safety education programmes to  
11 reduce risky sexual behaviors. Parents, teachers and healthcare professionals should  
12 pay particular attention on sexting. For example, healthcare professionals could ask  
13 young people about their sexual behavior in order to identify those who engage in  
14 risky sexual behaviors and provide them with appropriate information. Parents and  
15 teachers, moreover, need more and better education to understand the negative effects  
16 of sexting on the health of young people.

17

18

19

20

1 **References**

2

3 Barrense-Dias, Y., Berchtold, A., Surís, J.-C., & Akre, C. (2017). Sexting and the  
4 Definition Issue. *Journal of Adolescent Health, 61*(5), 544–554.  
5 <https://doi.org/10.1016/j.jadohealth.2017.05.009>

6 Baumgartner, S. E., Sumter, S. R., Peter, J., & Valkenburg, P. M. (2012). Identifying  
7 Teens at Risk: Developmental Pathways of Online and Offline Sexual Risk Behavior.  
8 *Pediatrics, 130*(6), e1489–e1496. <https://doi.org/10.1542/peds.2012-0842>

9 Bianchi, D., Baiocco, R., Morelli, M., & Chirumbolo, A. (2018). Psychometric  
10 properties of the Sexting Motivations Questionnaire for adolescents and young adults.  
11 *Rassegna Di Psicologia, 22*(3), 5–18.

12 Chaudhary, P., Peskin, M., Temple, J., Addy, R., Baumler, E., & Ross, S. (2017).  
13 Sexting and Mental Health: A School-Based Longitudinal Study among Youth in  
14 Texas. *Journal of Applied Research on Children, 8*(1), 1–29.

15 Dake, J. A., Price, J. H., Maziarz, L., & Ward, B. (2012). Prevalence and Correlates of  
16 Sexting Behavior in Adolescents. *American Journal of Sexuality Education, 7*(1), 1–  
17 15. <https://doi.org/10.1080/15546128.2012.650959>

18 Doyle, C., Douglas, E., & O'Reilly, G. (2021). The outcomes of sexting for children  
19 and adolescents: A systematic review of the literature. *Journal of Adolescence, 92*,  
20 86–113. <https://doi.org/10.1016/j.adolescence.2021.08.009>

21 Eugene, J. (2015). It's More Than Just "Sext"—A Brief Discussion on Sexting  
22 Activity Among Teens. *Journal of Adolescent Health, 57*(1), 128–129.  
23 <https://doi.org/10.1016/j.jadohealth.2015.02.021>

- 1 Frankel, A. S., Bass, S. B., Patterson, F., Dai, T., & Brown, D. (2018). Sexting, Risk  
2 Behavior, and Mental Health in Adolescents: An Examination of 2015 Pennsylvania  
3 Youth Risk Behavior Survey Data. *Journal of School Health*, 88(3), 190–199.  
4 <https://doi.org/10.1111/josh.12596>
- 5 Frost, J., & McKelvie, S. (2004). Self-Esteem and Body Satisfaction in Male and  
6 Female Elementary School, High School, and University Students. *Sex Roles*, 51(1/2),  
7 45–54. <https://doi.org/10.1023/B:SERS.0000032308.90104.c6>
- 8 Galanis P, Katsiroumpa Z, Katsiroumpa A, Tsakalaki A, Vasilopoulos S. (2013).  
9 Translation and validation of the “Sexting Motivation Questionnaire” in Greek.  
10 *Archives of Hellenic Medicine*, under press.
- 11 Galanou, C., Galanakis, M., Alexopoulos, E., Darviri, C. (2014). Rosenberg Self-  
12 Esteem Scale Greek Validation on Student Sample. *Psychology* 5, 819-827
- 13 Gámez-Guadix, M., & de Santisteban, P. (2018). “Sex Pics?”: Longitudinal Predictors  
14 of Sexting Among Adolescents. *Journal of Adolescent Health*, 63(5), 608–614.  
15 <https://doi.org/10.1016/j.jadohealth.2018.05.032>
- 16 Kerstens, J., & Stol, W. (2014). Receiving online sexual requests and producing  
17 online sexual images: The multifaceted and dialogic nature of adolescents’ online  
18 sexual interactions. *Cyberpsychology: Journal of Psychosocial Research on*  
19 *Cyberspace*, 8(1). <https://doi.org/10.5817/CP2014-1-8>
- 20 Kim, S., Martin-Storey, A., Drossos, A., Barbosa, S., & Georgiades, K. (2020).  
21 Prevalence and Correlates of Sexting Behaviors in a Provincially Representative  
22 Sample of Adolescents. *The Canadian Journal of Psychiatry*, 65(6), 401–408.  
23 <https://doi.org/10.1177/0706743719895205>
- 24 Klettke, B., Hallford, D. J., Clancy, E., Mellor, D. J., & Toumbourou, J. W. (2019).  
25 Sexting and Psychological Distress: The Role of Unwanted and Coerced Sexts.



- 1 *Cyberpsychology, Behavior, and Social Networking*, 22(4), 237–242.  
2 <https://doi.org/10.1089/cyber.2018.0291>
- 3 Klettke, B., Mellor, D., Silva-Myles, L., Clancy, E., & Sharma, M. K. (2018). Sexting  
4 and mental health: A study of Indian and Australian young adults. *Cyberpsychology:  
5 Journal of Psychosocial Research on Cyberspace*, 12(2).  
6 <https://doi.org/10.5817/CP2018-2-2>
- 7 Krieger, M. A. (2017). Unpacking “Sexting”: A Systematic Review of Nonconsensual  
8 Sexting in Legal, Educational, and Psychological Literatures. *Trauma, Violence, &  
9 Abuse*, 18(5), 593–601. <https://doi.org/10.1177/1524838016659486>
- 10 Livingstone, S., & Görzig, A. (2014). When adolescents receive sexual messages on  
11 the internet: Explaining experiences of risk and harm. *Computers in Human Behavior*,  
12 33, 8–15. <https://doi.org/10.1016/j.chb.2013.12.021>
- 13 Lovibond, S., Lovibond, P. (1995). Manual for the depression, anxiety & stress scales.  
14 Sydney, Psychology Foundation
- 15 Lyrakos, N., Arvaniti, C., Smyrnioti, M., Kostopanagiotou, G. (2011). Translation and  
16 validation study of the depression anxiety scale in the Greek general population and in  
17 a psychiatric patients' sample. *European Psychiatry*, 26:1731
- 18 Molla-Esparza, C., López-González, E., & Losilla, J.-M. (2021). Sexting Prevalence  
19 and Socio-Demographic Correlates in Spanish Secondary School Students. *Sexuality  
20 Research and Social Policy*, 18(1), 97–111. [https://doi.org/10.1007/s13178-020-  
21 00434-0](https://doi.org/10.1007/s13178-020-00434-0)
- 22 Rosenberg, M. (1965). *Society and the adolescent self-image*. Princeton University  
23 Press.

- 1 Schoeps, K., Peris-Hernández, M., Garaigordobil, M., & Montoya-Castilla, I. (2020).  
2 Risk factors for being a victim of online grooming in adolescents. *Psicothema*, *32.1*,  
3 15–23. <https://doi.org/10.7334/psicothema2019.179>
- 4 Scholes-Balog, K., Francke, N., & Hemphill, S. (2016). Relationships Between  
5 Sexting, Self-Esteem, and Sensation Seeking Among Australian Young Adults.  
6 *Sexualization, Media, & Society*, *2(2)*, 237462381562779.  
7 <https://doi.org/10.1177/2374623815627790>
- 8 Sesar, K. (2021). Young People Who Sext: The Role of Self-Esteem and Body-  
9 Esteem. *The Central European Journal of Paediatrics*, *17(1)*, 52–65.  
10 <https://doi.org/10.5457/p2005-114.288>
- 11 Tamarit, A., Schoeps, K., Peris-Hernández, M., & Montoya-Castilla, I. (2021). The  
12 Impact of Adolescent Internet Addiction on Sexual Online Victimization: The  
13 Mediating Effects of Sexting and Body Self-Esteem. *International Journal of*  
14 *Environmental Research and Public Health*, *18(8)*, 4226.  
15 <https://doi.org/10.3390/ijerph18084226>
- 16 Temple, J. R., Le, V. D., van den Berg, P., Ling, Y., Paul, J. A., & Temple, B. W.  
17 (2014). Brief report: Teen sexting and psychosocial health. *Journal of Adolescence*,  
18 *37(1)*, 33–36. <https://doi.org/10.1016/j.adolescence.2013.10.008>
- 19 Van Ouytsel, J., Van Gool, E., Ponnet, K., & Walrave, M. (2014). Brief report: The  
20 association between adolescents' characteristics and engagement in sexting. *Journal*  
21 *of Adolescence*, *37(8)*, 1387–1391. <https://doi.org/10.1016/j.adolescence.2014.10.004>
- 22 Vanden Abeele, M., Roe, K., & Eggermont, S. (2012). An exploration of adolescents'  
23 sexual contact and conduct risks through mobile phone use. *Communications*, *37(1)*.  
24 <https://doi.org/10.1515/commun-2012-0003>

1 Wachs, S., Wright, M. F., & Wolf, K. D. (2017). Psychological Correlates of Teen  
2 Sexting in three Countries – Direct and Indirect Associations between Self-control,  
3 Self-esteem, and Sexting. *International Journal of Developmental Science*, 11(3–4),  
4 109–120. <https://doi.org/10.3233/DEV-160212>

5 Walker, S., Sanci, L., & Temple-Smith, M. (2011). *Sexting and young people:  
6 Experts' views*. 30(4), 8–16.

7 Ybarra, M. L., & Mitchell, K. J. (2014). “Sexting” and its relation to sexual activity  
8 and sexual risk behavior in a national survey of adolescents. *The Journal of  
9 Adolescent Health*, 55(6), 757–764. <https://doi.org/10.1016/j.jadohealth.2014.07.012>

10

11
